# Supplementary material for: Optical and structural characterization of blue-emitting Mg2+- and Zn2+-doped GaN nanoparticles
Source: Royal Society of Chemistry journal article supplement (doi:10.1039/b903539g), 2009-01-01
Supplement: b903539g.pdf [file b903539g.pdf]

**J. Mater. Chem. B903539G**

**Supporting Information**

**Optical and Structural Characterization of the blue-emitting Mg<sup>2+</sup>- and Zn<sup>2+</sup>-  
doped GaN Nanoparticles**

**Venkataramanan Mahalingam, Enrico Bovero, Prabhakaran Munusamy,  
and Frank C. J. M. van Veggel\***

*University of Victoria, Department of Chemistry, P. O. Box 3065, Victoria, British  
Columbia, Canada, V8W 3V6.*

**Rui Wang, and Andrew J. Steckl**

*Department of Electrical and Computer Engineering, University of Cincinnati, Ohio,  
Cincinnati 45221-0030*

**Size of the Nanoparticles**

Hereafter are reported the TEM images for all the samples discussed in the paper. The size of the particles ranges from 2 to 5 nm in all cases and the shape is roughly spherical.

---

\* Corresponding author Email: fvv@uvic.ca

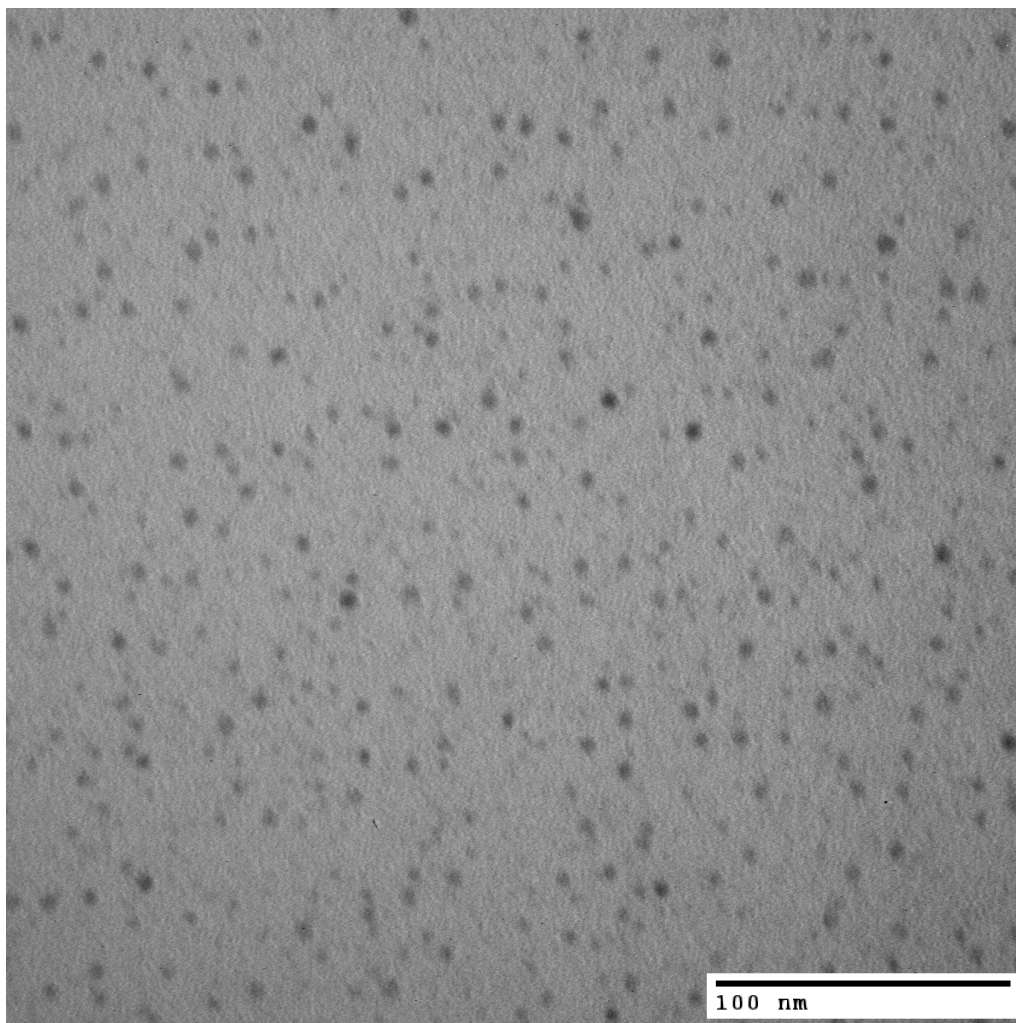

Figure S1: TEM image of 11.9% Mg:GaN

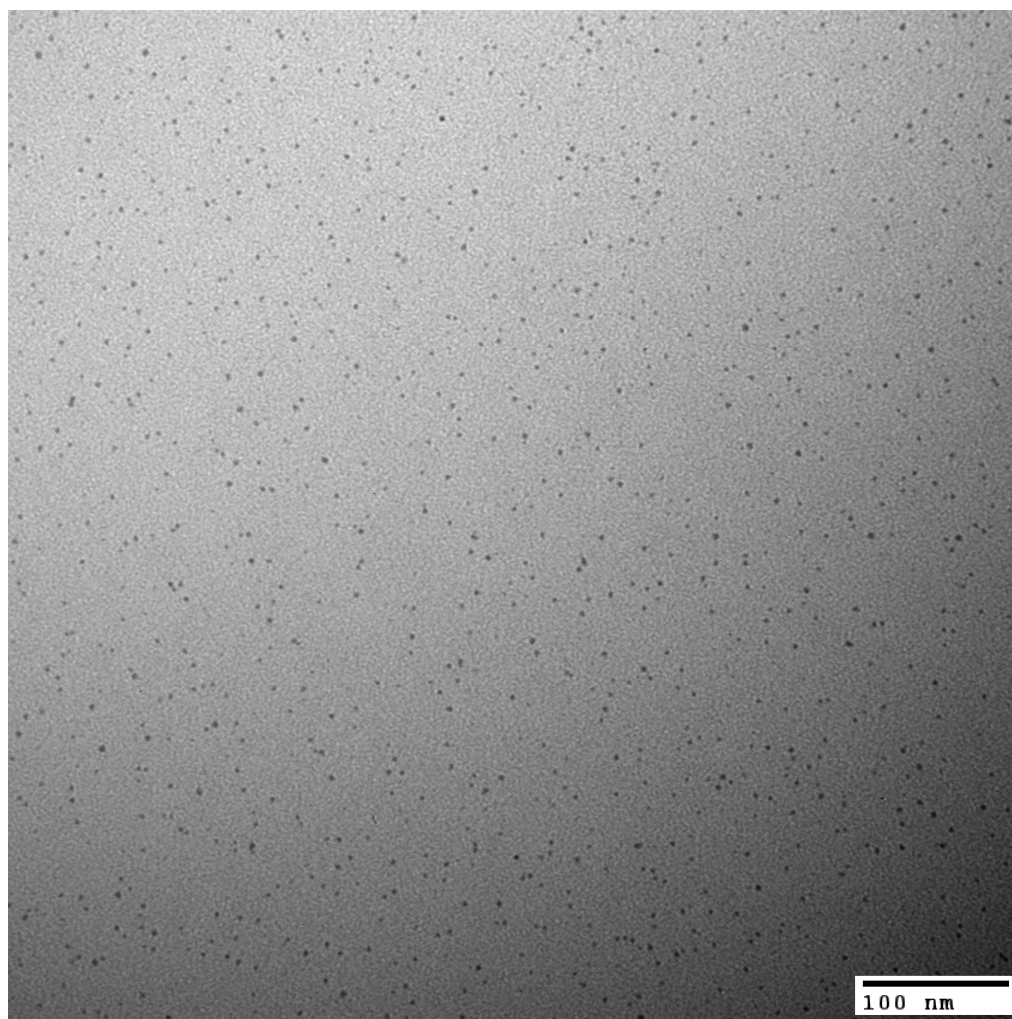

Figure S2: TEM image of 15.4% Mg:GaN

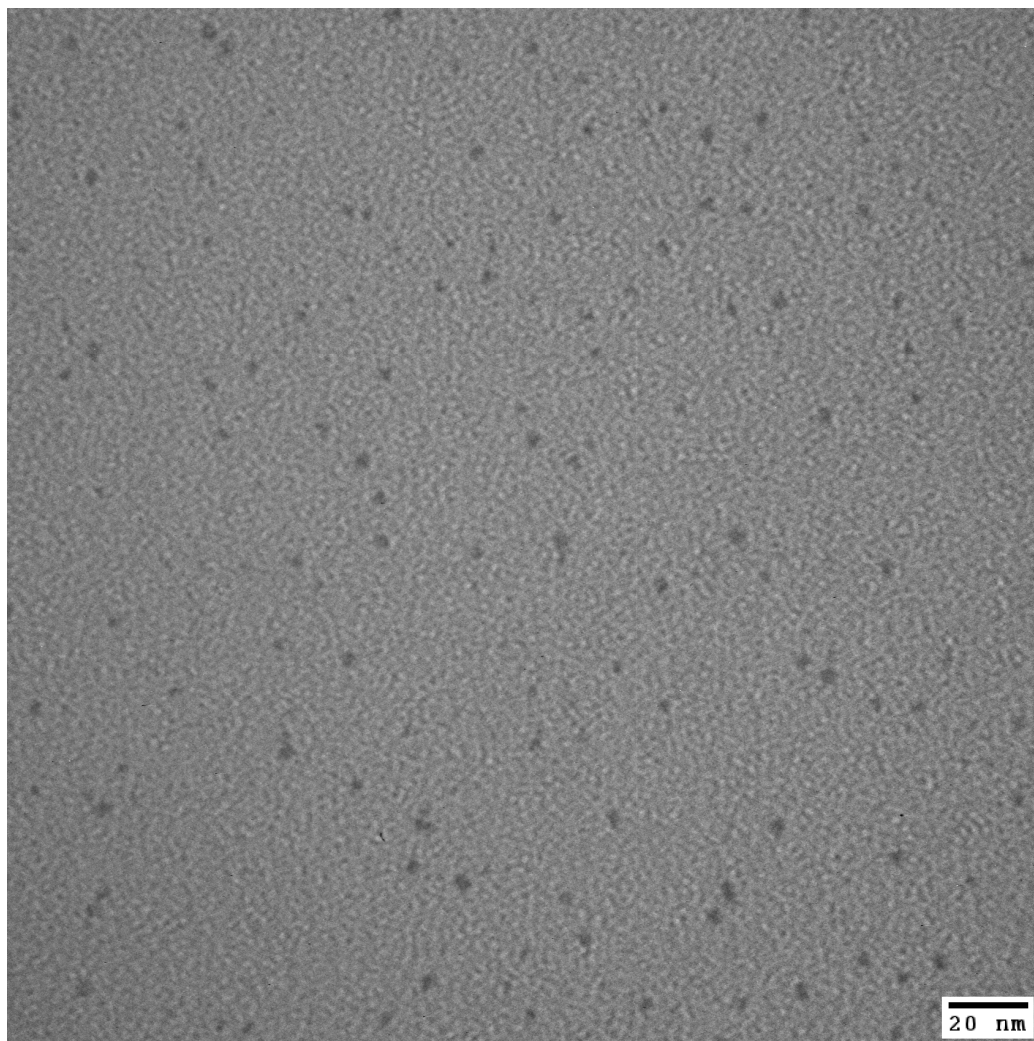

Figure S3: TEM image of 15.4% Mg:GaN



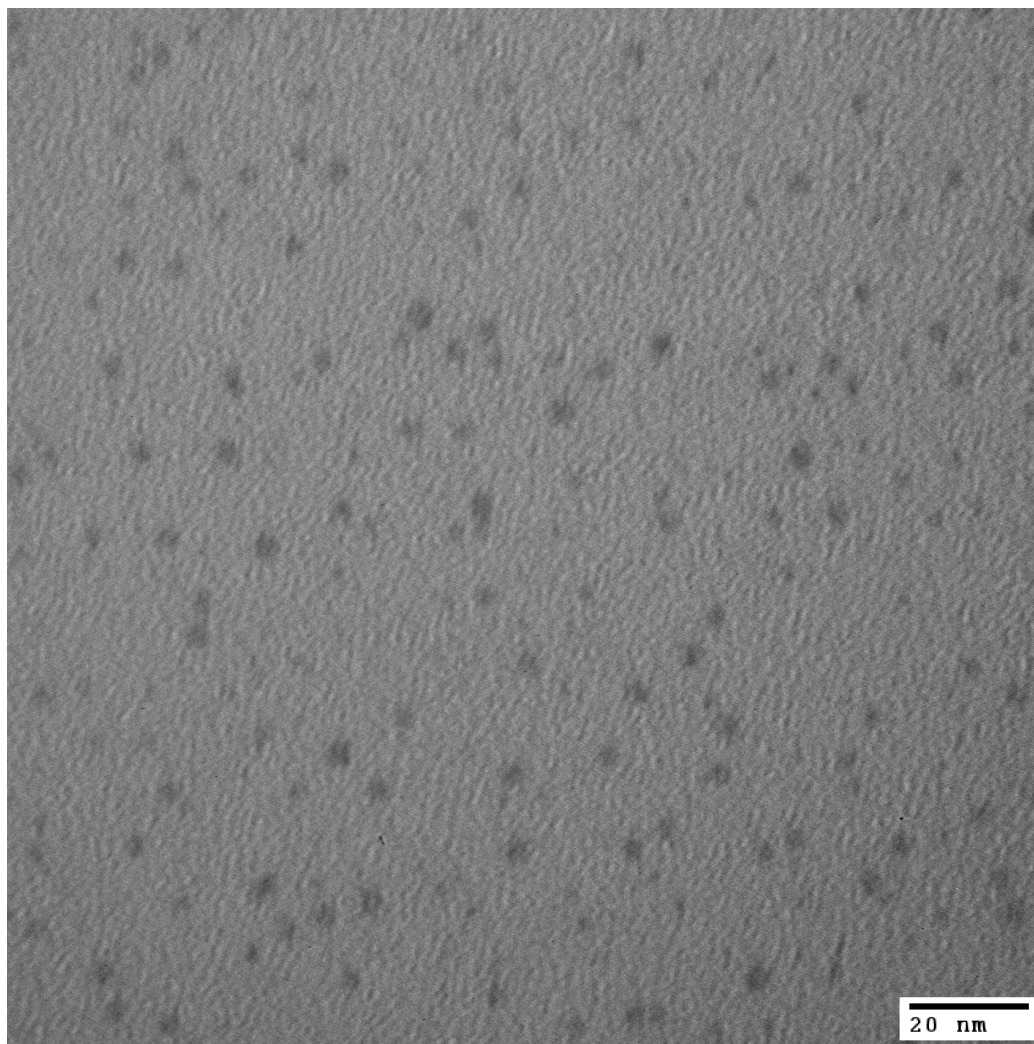

Figure S4: TEM image of 24.7% Mg:GaN

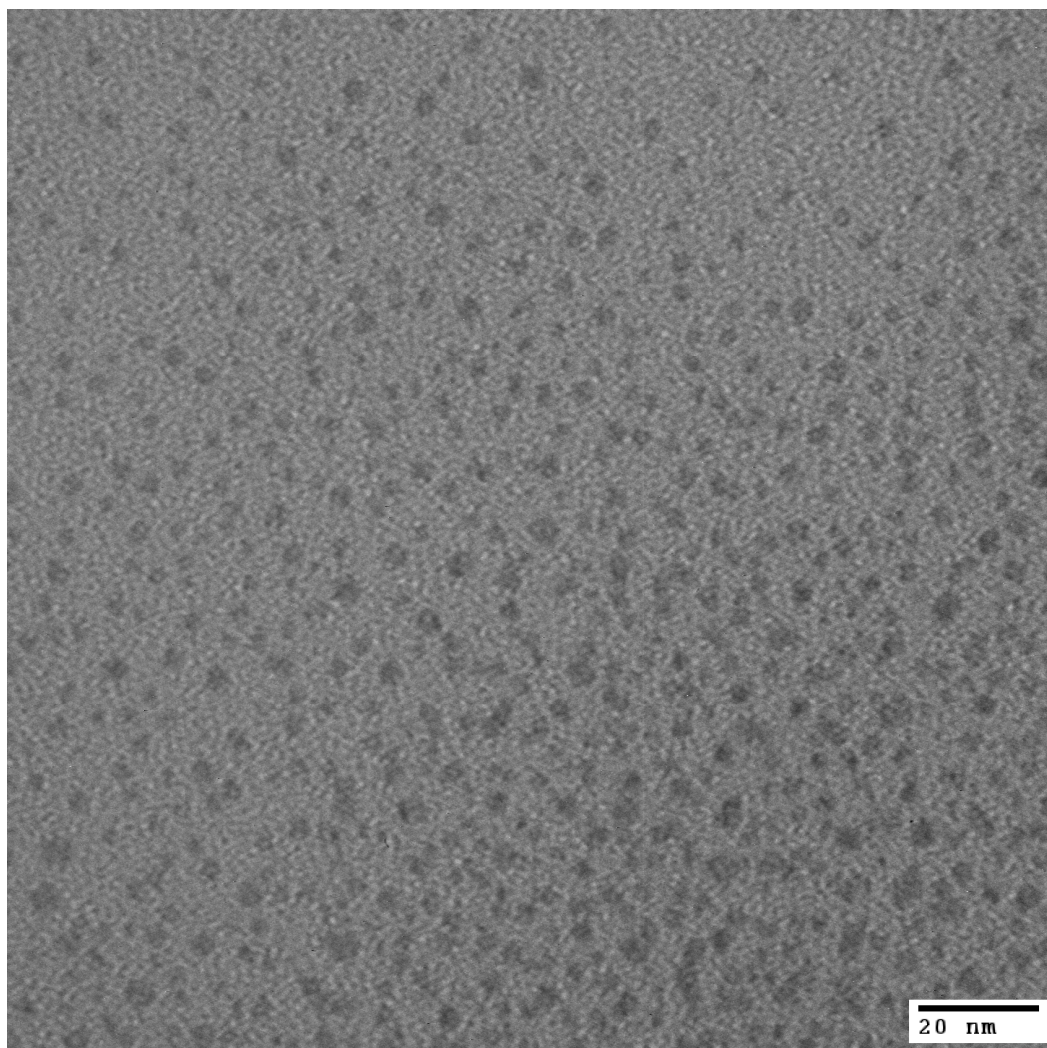

Figure S5: TEM image of 2.9% Zn:GaN

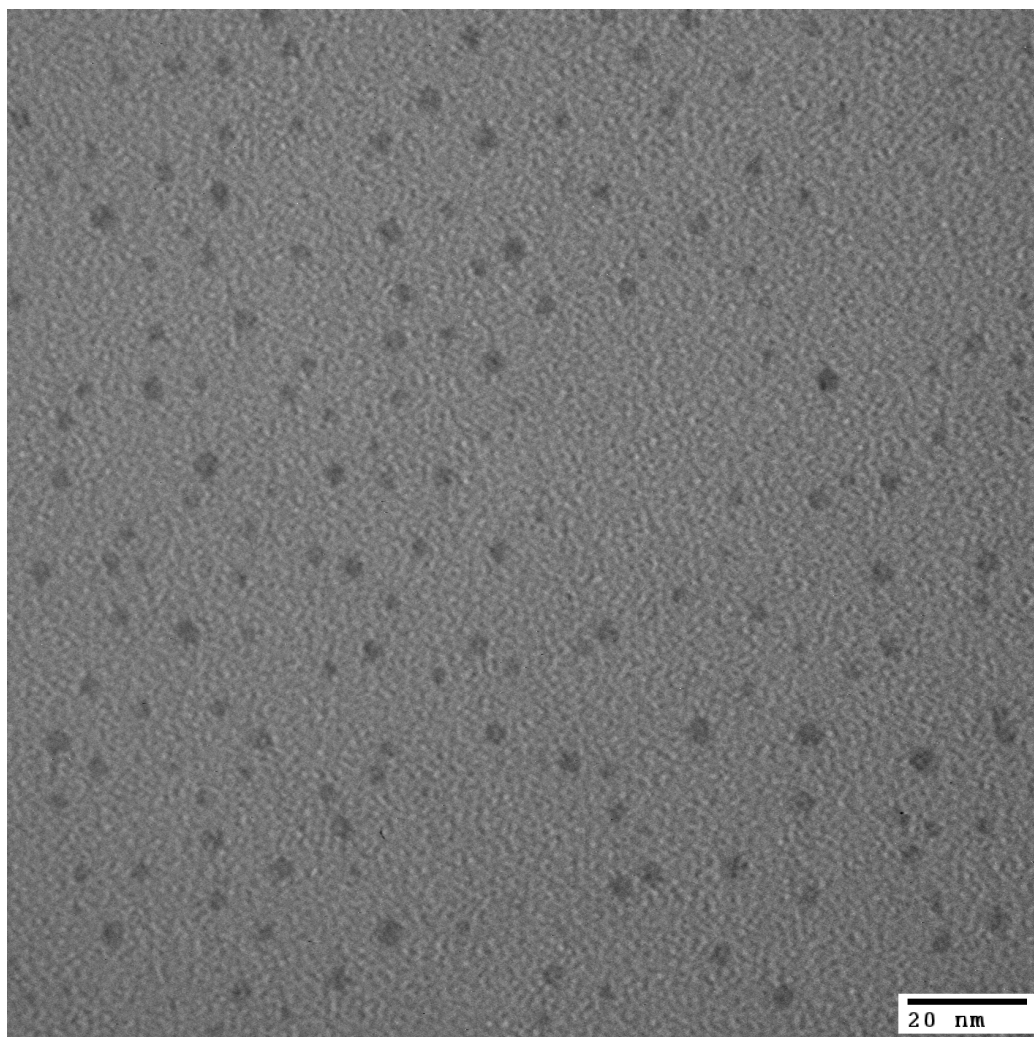

Figure S6: TEM image of 2.6% Zn:GaN

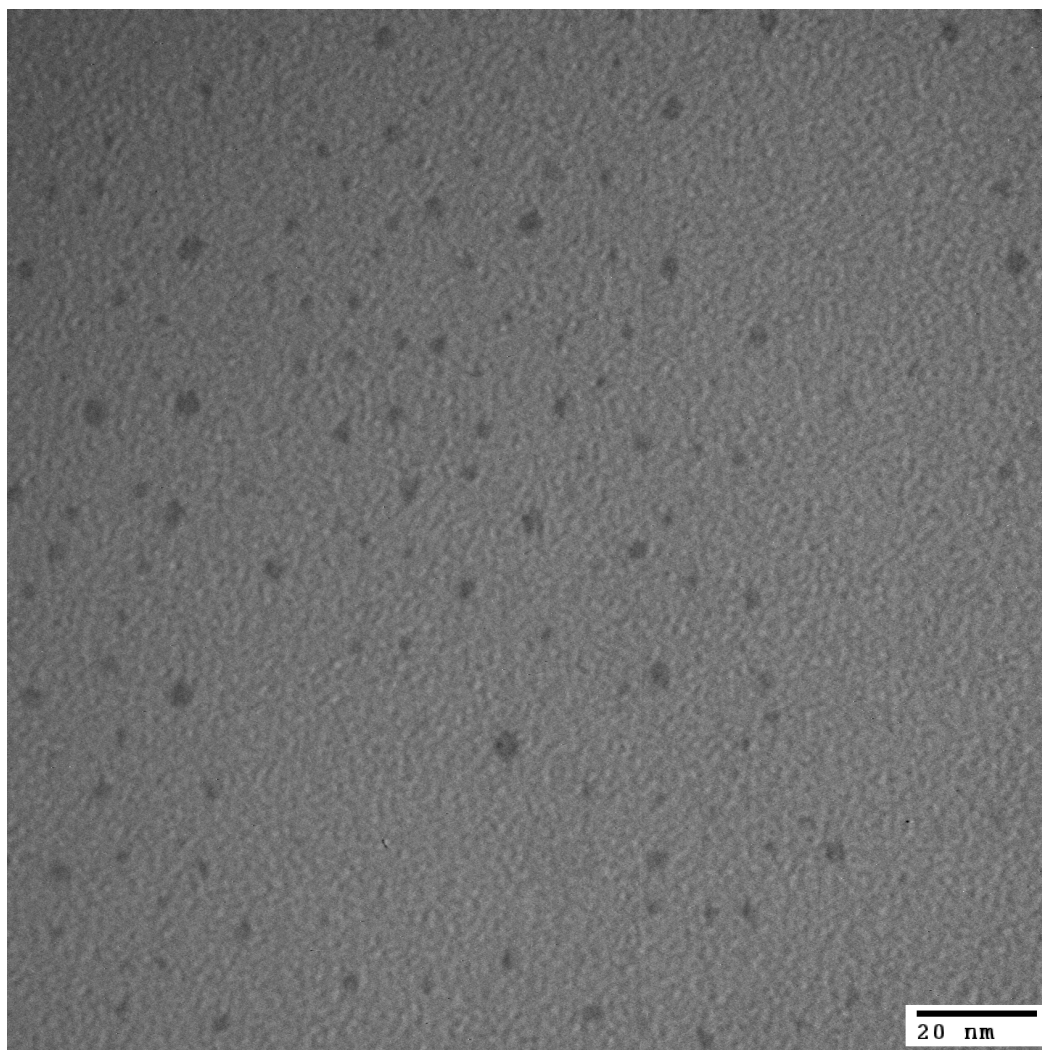

Figure S7: TEM image of 2.9% Zn:GaN
